# Supplementary material
Source: PubMed Central journal article supplement (PMC6250074)
Supplement: NIHMS1509213-supplement-1.pdf [file NIHMS1509213-supplement-1.pdf]

## Figure S1

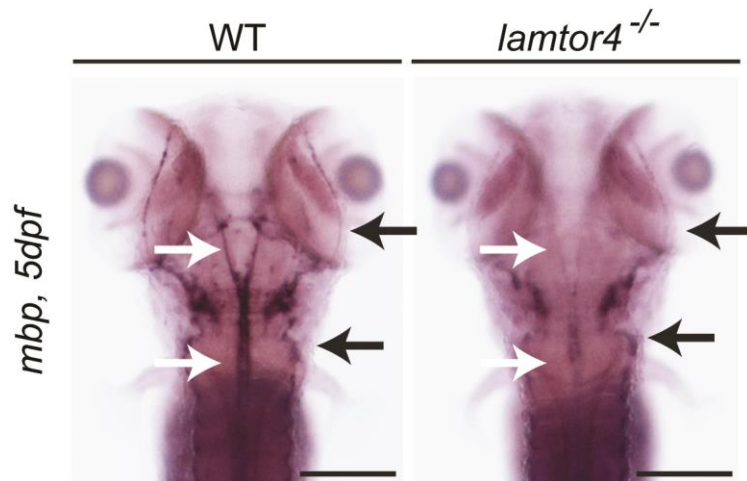

### Figure S1. Related to Figure 1. *lamtor4* is essential for CNS myelination.

(A) Analysis of *mbp* mRNA expression at 5 dpf by whole mount *in situ* hybridization. Compared to their wildtype siblings, *lamtor4*<sup>-/-</sup> mutants show reduced *mbp* expression in the CNS (white arrows), whereas *mbp* expression in the PNS is normal (black arrows). All panels show dorsal views, with anterior to the top. Genotypes were determined by PCR after imaging. Scale bar = 50  $\mu$ m.

## Figure S2

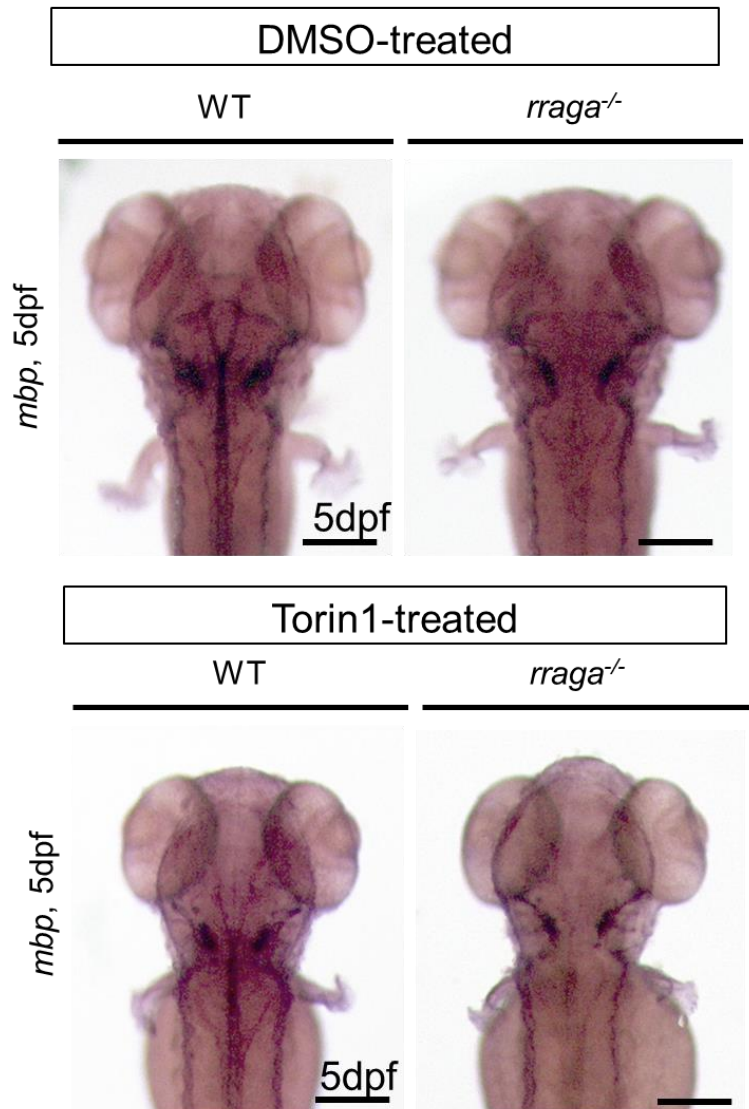

**Figure S2. Related to Figure 1. Torin treated fish are developmentally delayed**  
*mbp* mRNA expression at 5 dpf as detected by whole mount *in situ* hybridization. Wildtype larvae treated with the mTOR signaling pathway inhibitor TORIN1 have delayed developmental progression and slightly reduced levels of *mbp* mRNA both in the CNS and PNS. Genotypes were determined by PCR after imaging. Scale bar = 50 μm.

## Figure S3

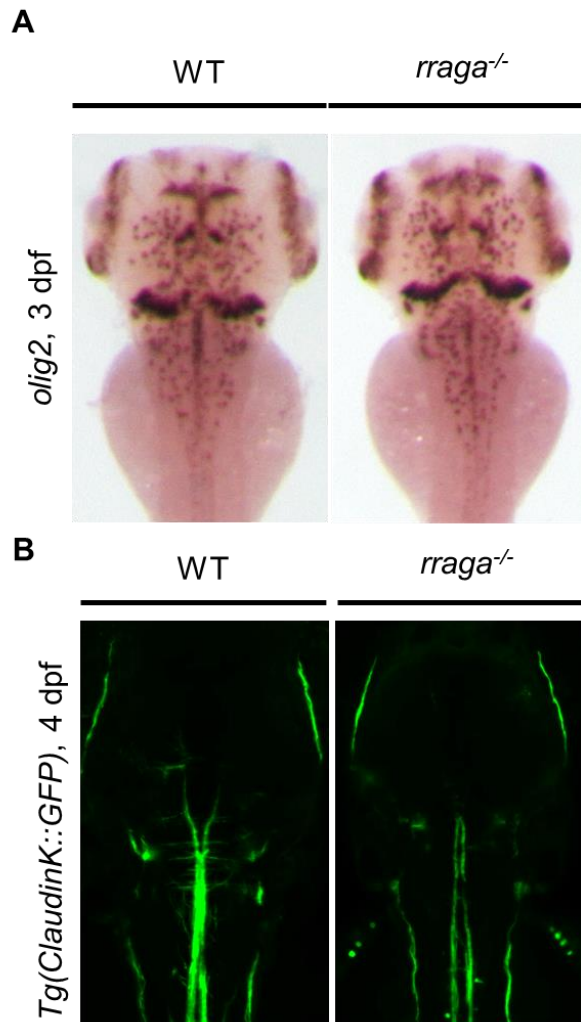

**Figure S3. Related to Figure 2. *rraga*<sup>-/-</sup> mutants have normal number of cells expressing *olig2*.**

(A) Analysis of *olig2* mRNA expression at 3 dpf by whole mount *in situ* hybridization. Number of *olig2* positive cells is similar in *rraga*<sup>-/-</sup> mutants and wildtype siblings.

(B) Dorsal view of 4 dpf *Tg(claudinK::GFP)* zebrafish larvae shows that *rraga*<sup>-/-</sup> mutants express claudinK:GFP, but at reduced levels. Genotypes were determined by PCR after imaging

# Figure S4

A

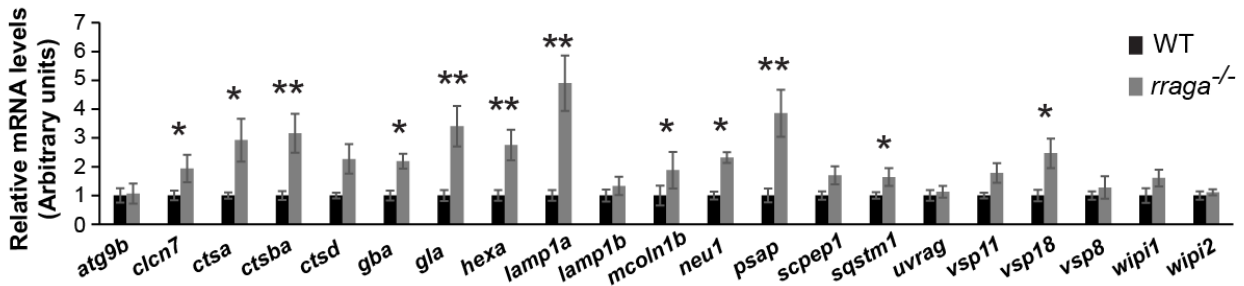

B

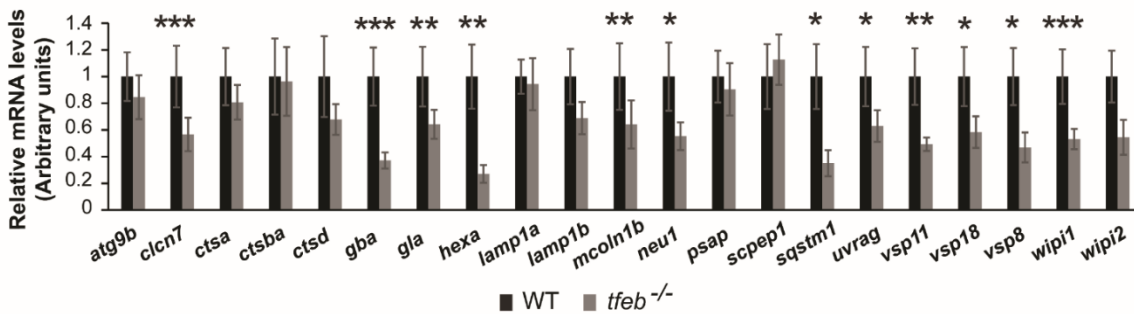

**Figure S4. Related to Figure 3. RagA promotes CNS myelination by repressing TFEB**

(A) Whole animal quantitative RT-PCR analysis reveals overexpression of some TFEB target genes in *rraga*<sup>-/-</sup> mutants. (B) Whole animal qRT-PCR reveals reduced expression of some TFEB target genes in *tfeb*<sup>-/-</sup> mutants. Graphs depict average values and standard error of the mean (\*\* p < 0.01, Student T-test, two-tailed).

## Figure S5

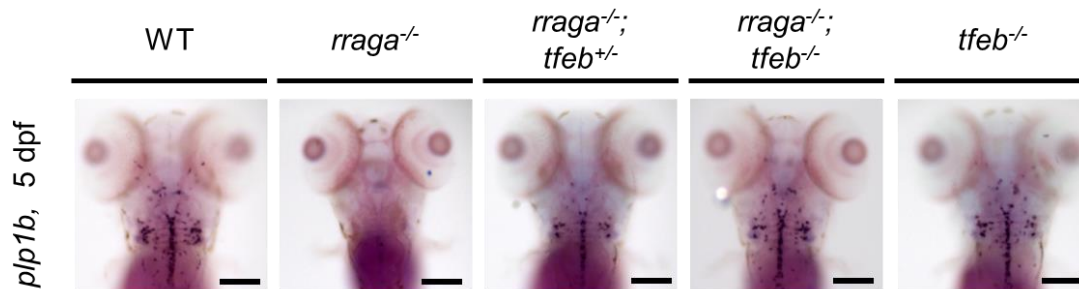

**Figure S5. Related to Figure 3. *plp* expression is restored in *rraga*<sup>-/-</sup>;*tfeb*<sup>-/-</sup> double mutants**

Dorsal view of 5 dpf whole mount in situ hybridization to detect *plp1b* mRNA. Expression of *plp1b* mRNA is nearly absent in *rraga*<sup>-/-</sup> mutants, but is restored in *rraga*<sup>-/-</sup>;*tfeb*<sup>-/-</sup> double mutants. By this assay *rraga*<sup>-/-</sup>;*tfeb*<sup>-/-</sup> double mutants and *tfeb*<sup>-/-</sup> mutants are indistinguishable from wildtype larvae. Expression of *mbp* is also partly rescued in *rraga*<sup>-/-</sup>;*tfeb*<sup>+/-</sup> mutants. Genotypes were determined by PCR after imaging. Scale bar = 50  $\mu$ m

## Table S3

Table S3. Related to Figure 3. Upregulated or downregulated TFEB target genes in FAC-sorted *cldnk:GFP* positive cells of *rraga*<sup>-/-</sup> mutants

| Upregulated TFEB target genes |            | Downregulated TFEB target genes |            |
|-------------------------------|------------|---------------------------------|------------|
| Zebrafish Gene                | Human Gene | Zebrafish Gene                  | Human Gene |
| agtrap                        | AGTRAP     | hoxc13a                         | HOXC13     |
| amdhd2                        | AMDHD2     | prkag2b                         | PRKAG2     |
| atp6ap1b                      | ATP6AP1    | naglu                           | NAGLU      |
| atp6v0e1                      | atp6v0e1   | comtd1                          | COMTD1     |
| atp6v1ab                      | ATP6V1A    |                                 |            |
| cst14a.2                      | CSTB       |                                 |            |
| cst14b.1                      | CSTB       |                                 |            |
| ctsa                          | CTSA       |                                 |            |
| ctsba                         | CSTB       |                                 |            |
| flcn                          | FLCN       |                                 |            |
| hexb                          | HEXB       |                                 |            |
| hoxb7a                        | HOXB7      |                                 |            |
| ifi30                         | IFI30      |                                 |            |
| megf9                         | MEGF9      |                                 |            |
| sqstm1                        | SQSTM1     |                                 |            |
| tpp1                          | TPP1       |                                 |            |
| vps33a                        | VPS33A     |                                 |            |
